# Supplementary material for: Small Companies And Aerospace Standards
Source: MDPI journal article supplement (doi:10.3390/diagnostics14050514), 2005-01-01
Supplement: s1 [file s1]

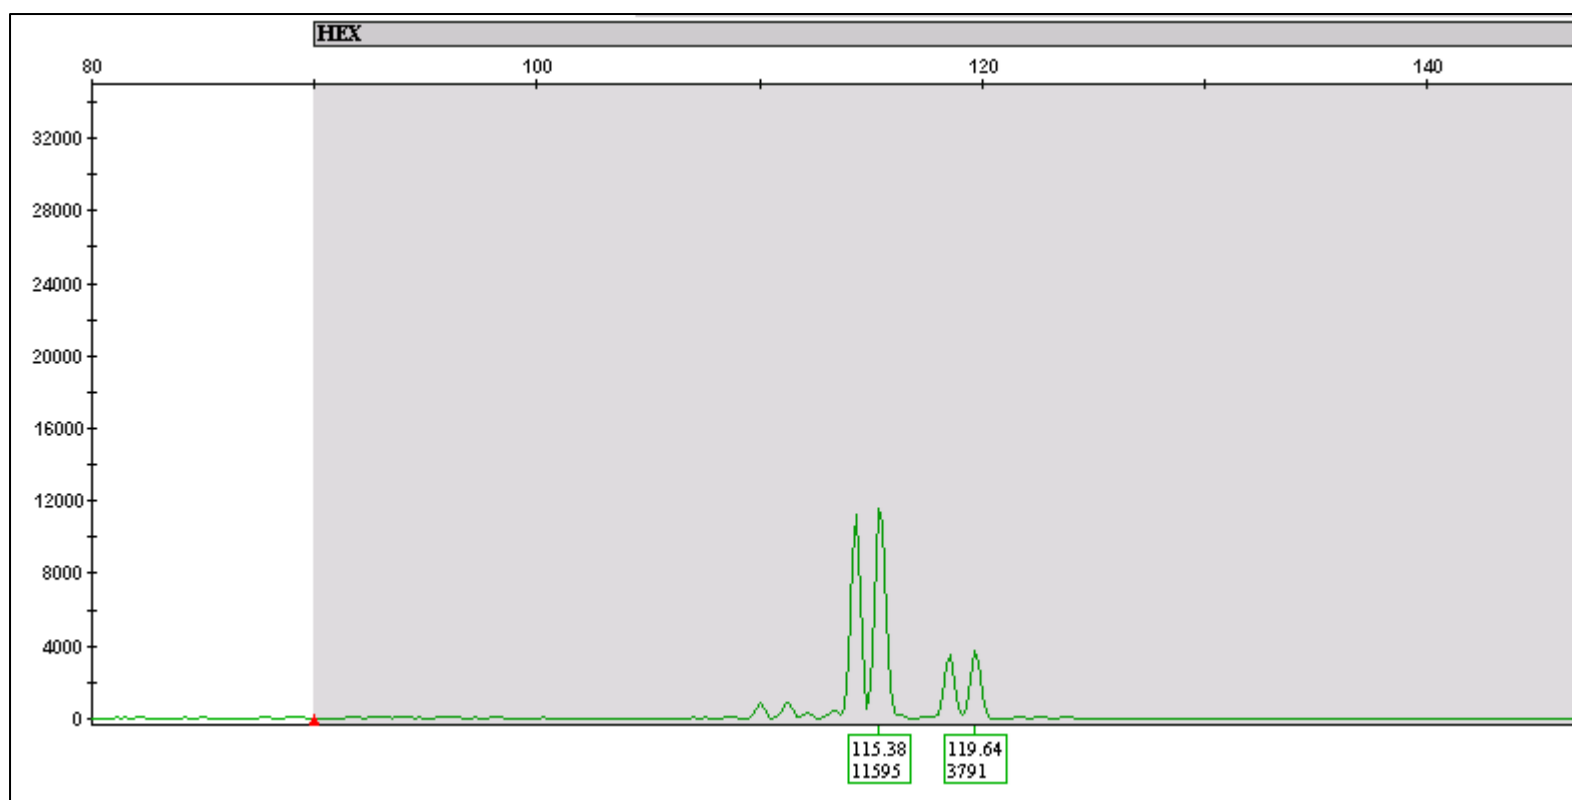

**Supplementary Figure S1.** Representative image shows the capillary electropherogram for the *D9S254* STR region for a sample with two alleles presented in a 3:1 allele ratio.



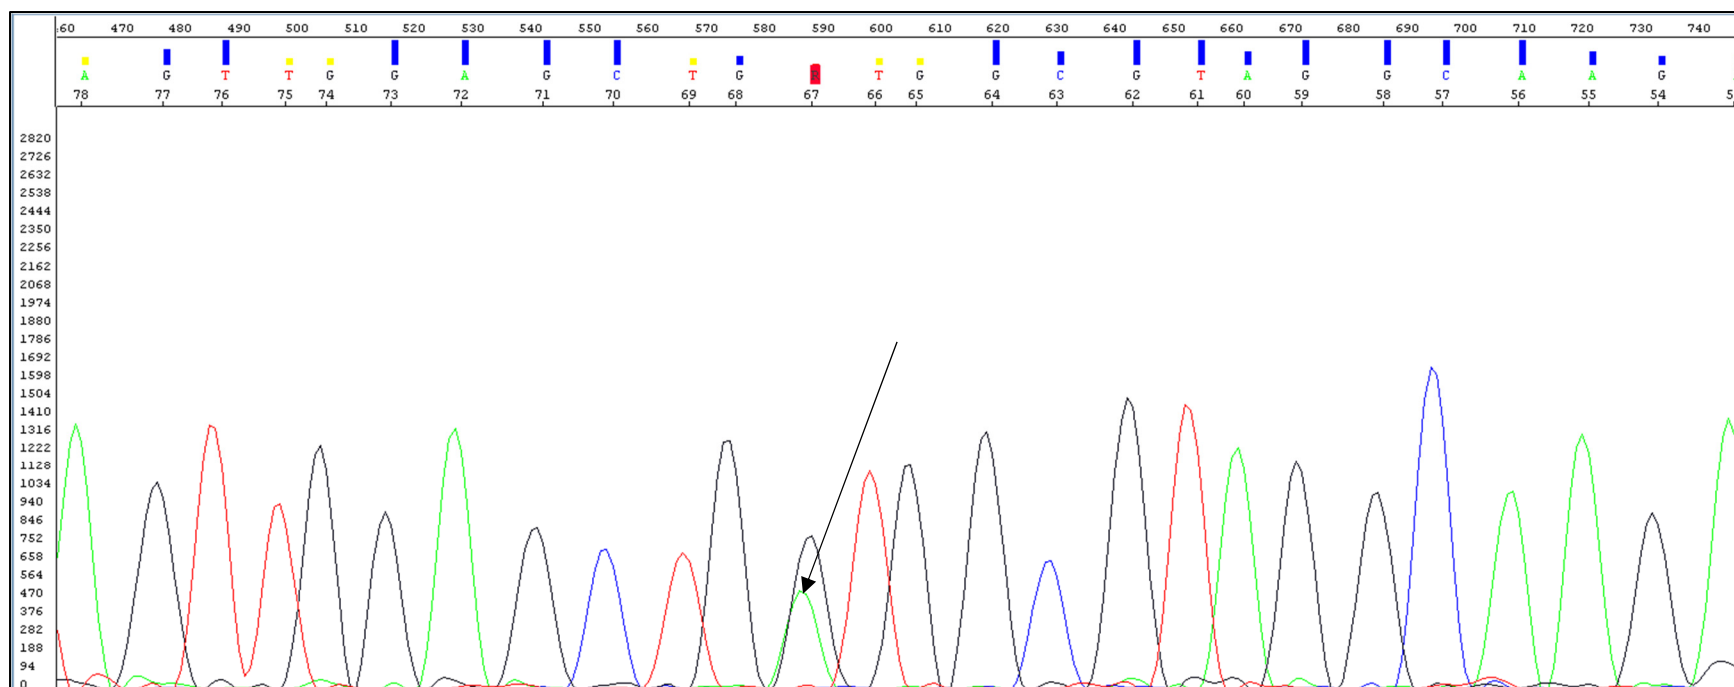

**Supplementary Figure S3.** Representative image of a Sanger sequencing chromatogram showing the detection of a *KRAS*\_G12D mutation indicated by the arrow.

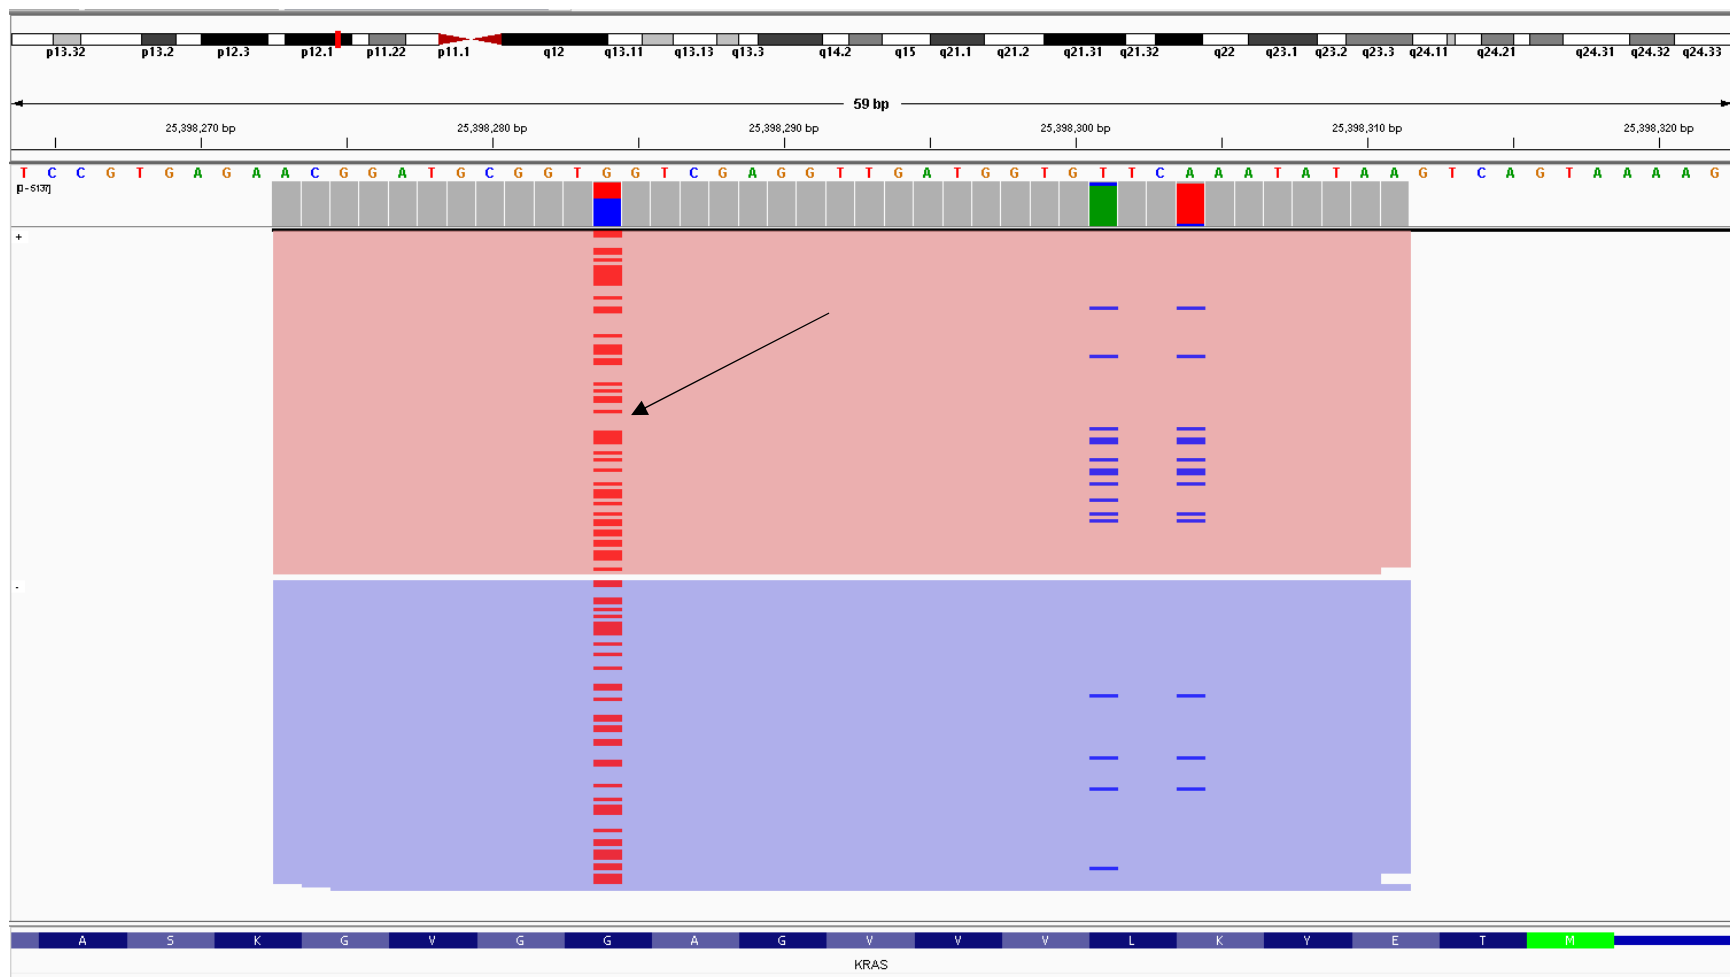

**Supplementary Figure S4.** Integrated genomics viewer (IGV) snapshot shows a representative image of the NGS alignment, and the *KRAS*\_G12D (indicated by an arrow) mutation detected in the sample was also analyzed by Sanger sequencing, as shown in Supplementary Figure S3.

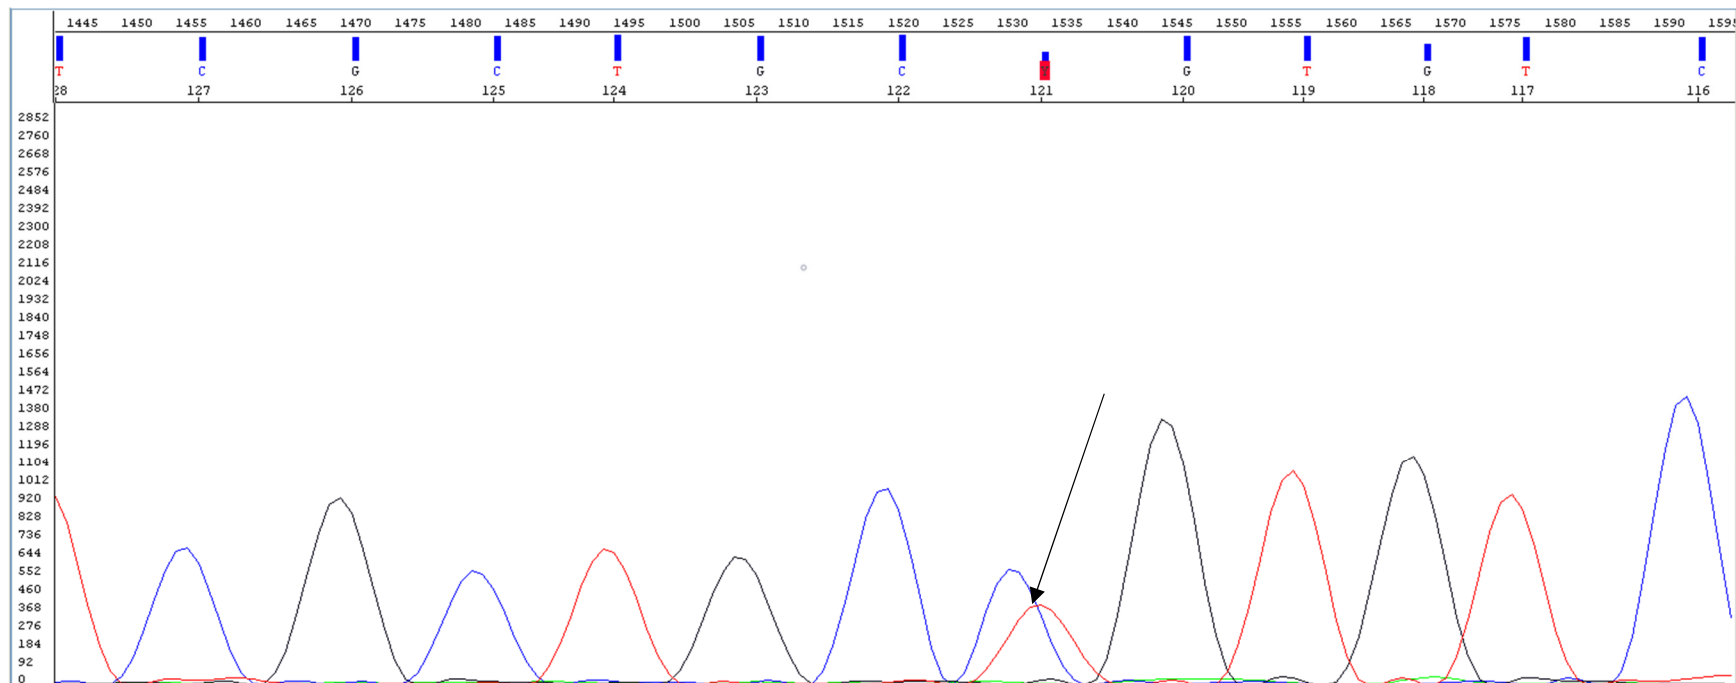

**Supplementary Figure S5.** Representative image of a Sanger sequencing chromatogram showing the detection of a *GNAS*\_R201C mutation indicated by the arrow.

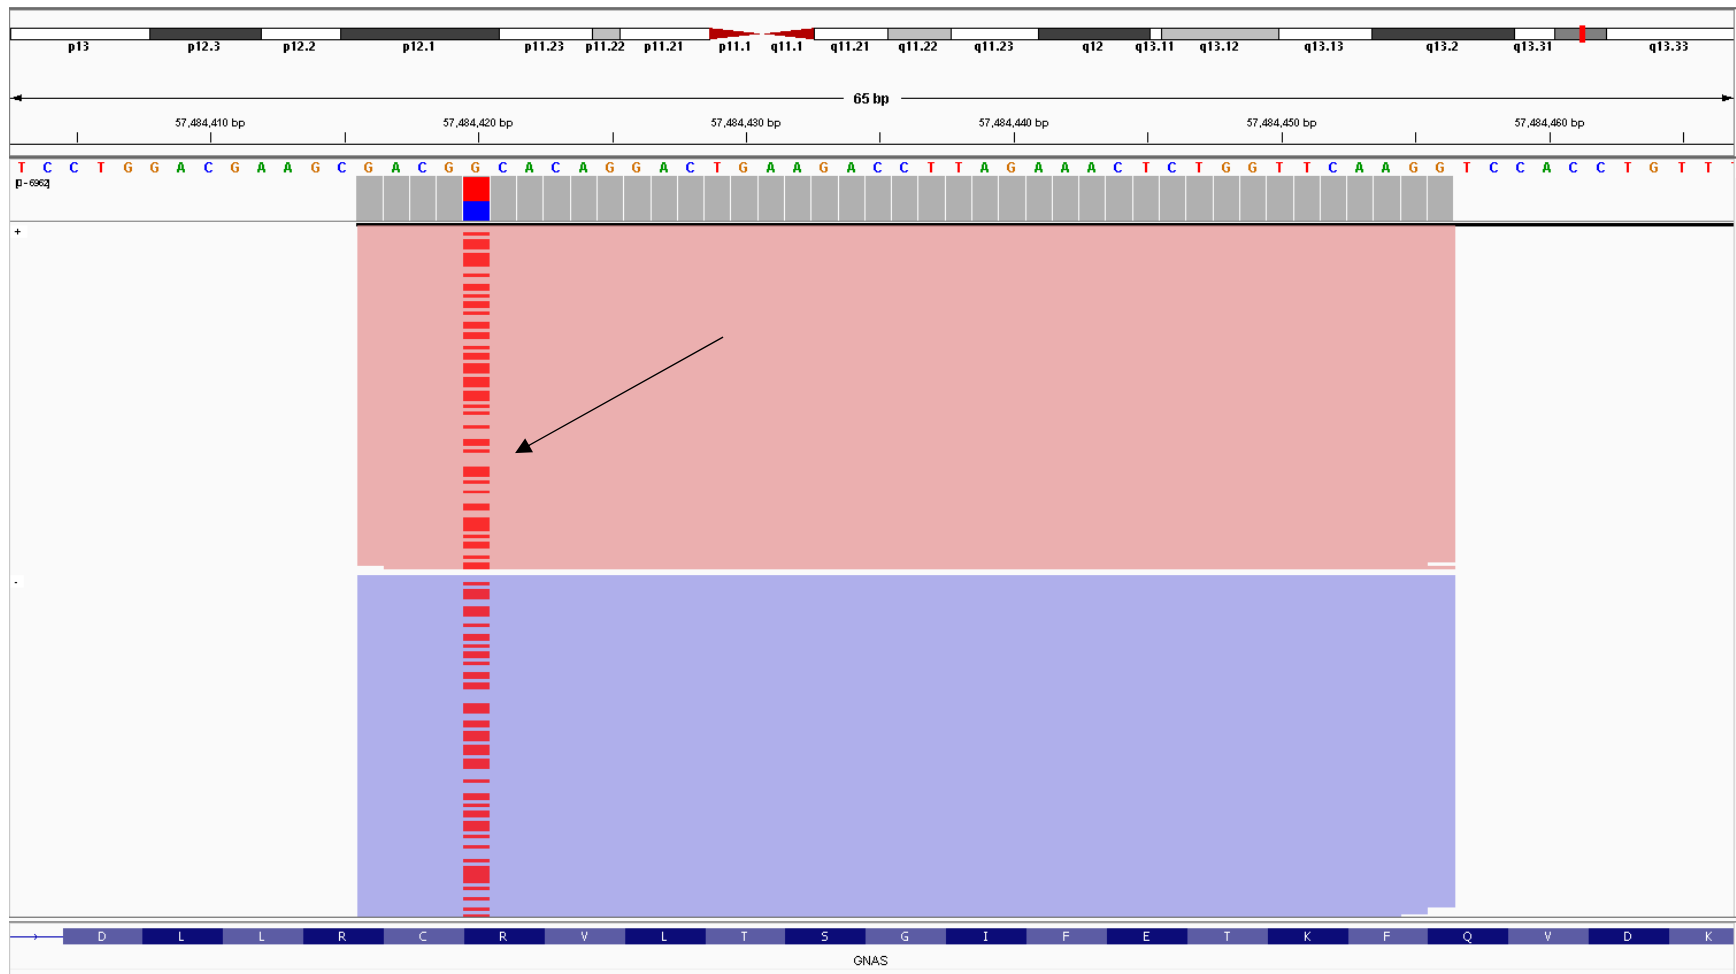

**Supplementary Figure S6.** Integrated genomics viewer (IGV) snapshot shows a representative image of the NGS alignment, and the *GNAS*\_R201C (indicated by an arrow) mutation detected in the sample was also analyzed by Sanger sequencing, as shown in Supplementary Figure S5.

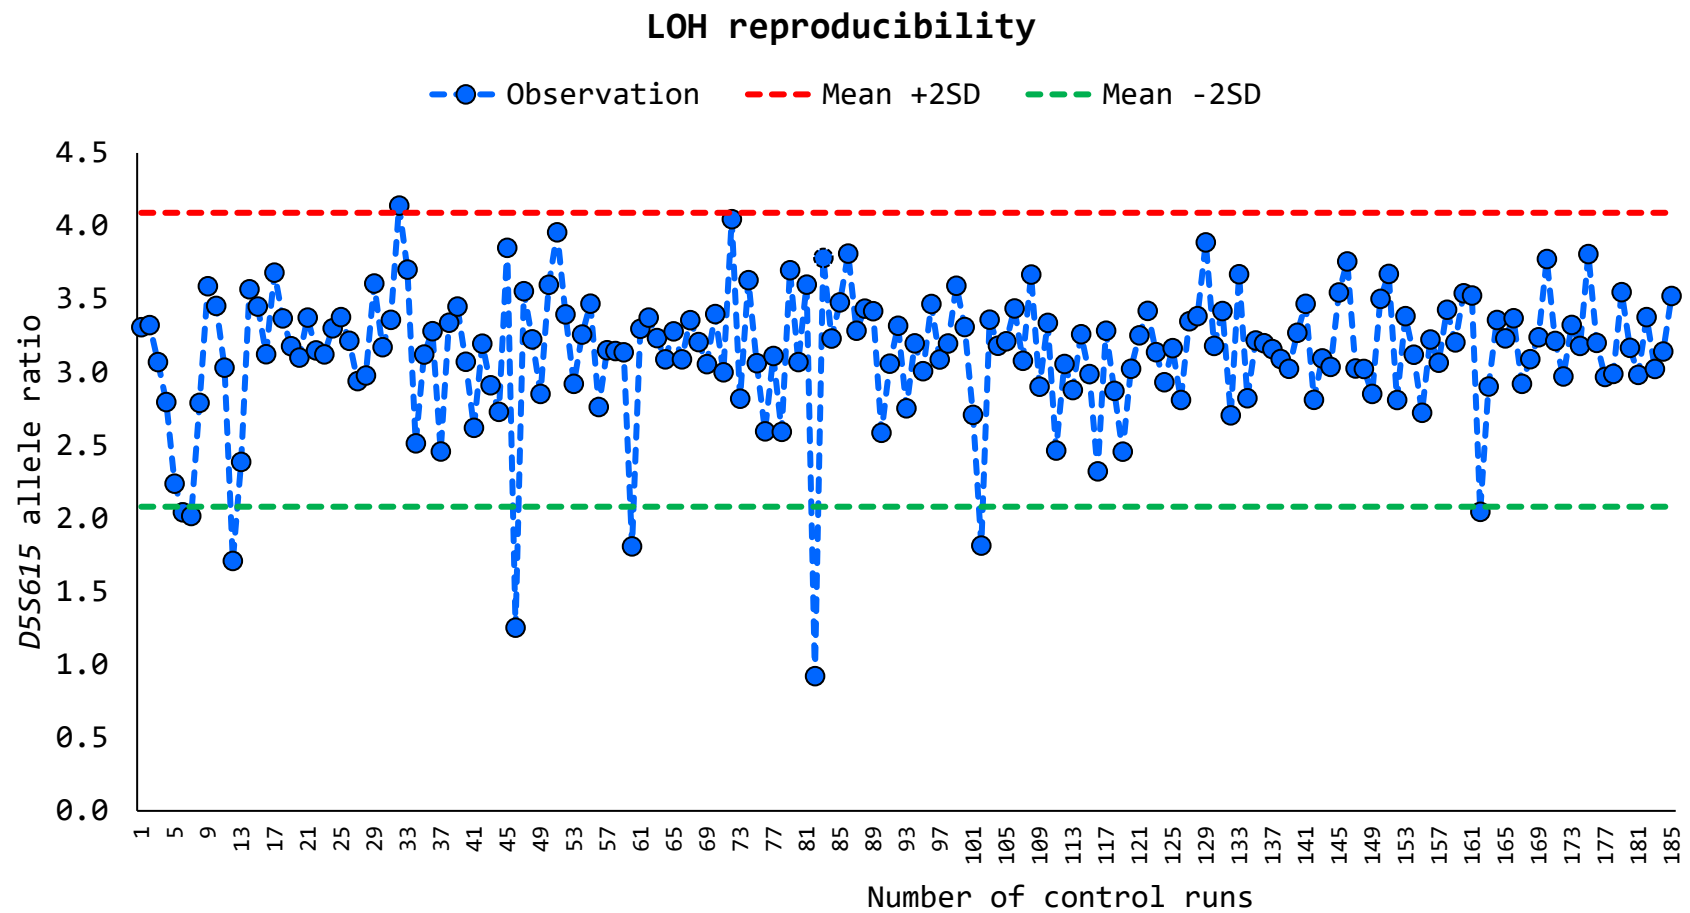

**Supplementary Figure S7.** Levy Jennings plot shows the reproducibility of *D5S615* LOH detection in a clinical setting for one month. A process control sample with an expected 3:1 allele ratio is detected with a mean 3.09 allele ratio between the alleles ( $n = 185$ ). Red and green lines show  $\pm 2$  standard deviations from the mean.

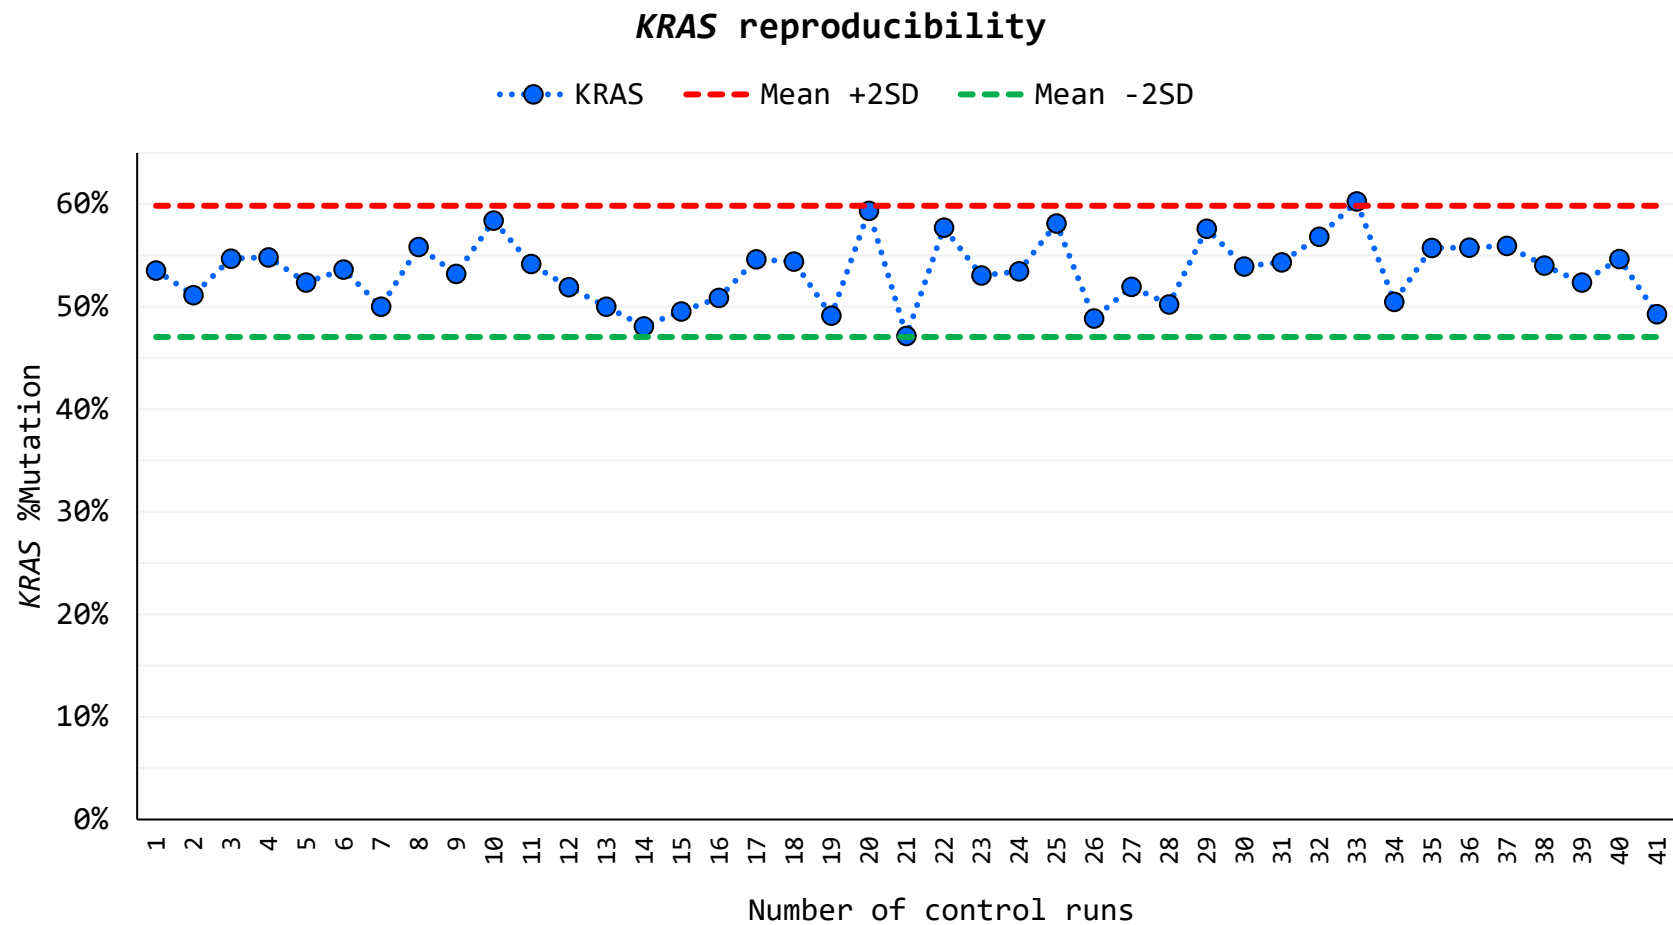

**Supplementary Figure S8.** Levy Jennings plot shows the reproducibility of *KRAS* mutation detection in a clinical setting for one month. A process control sample (Horizon) with an expected 50% mutation is detected with a mean of 53.4% ( $n = 41$ ). Red and green lines show  $\pm 2$  standard deviations from the mean.



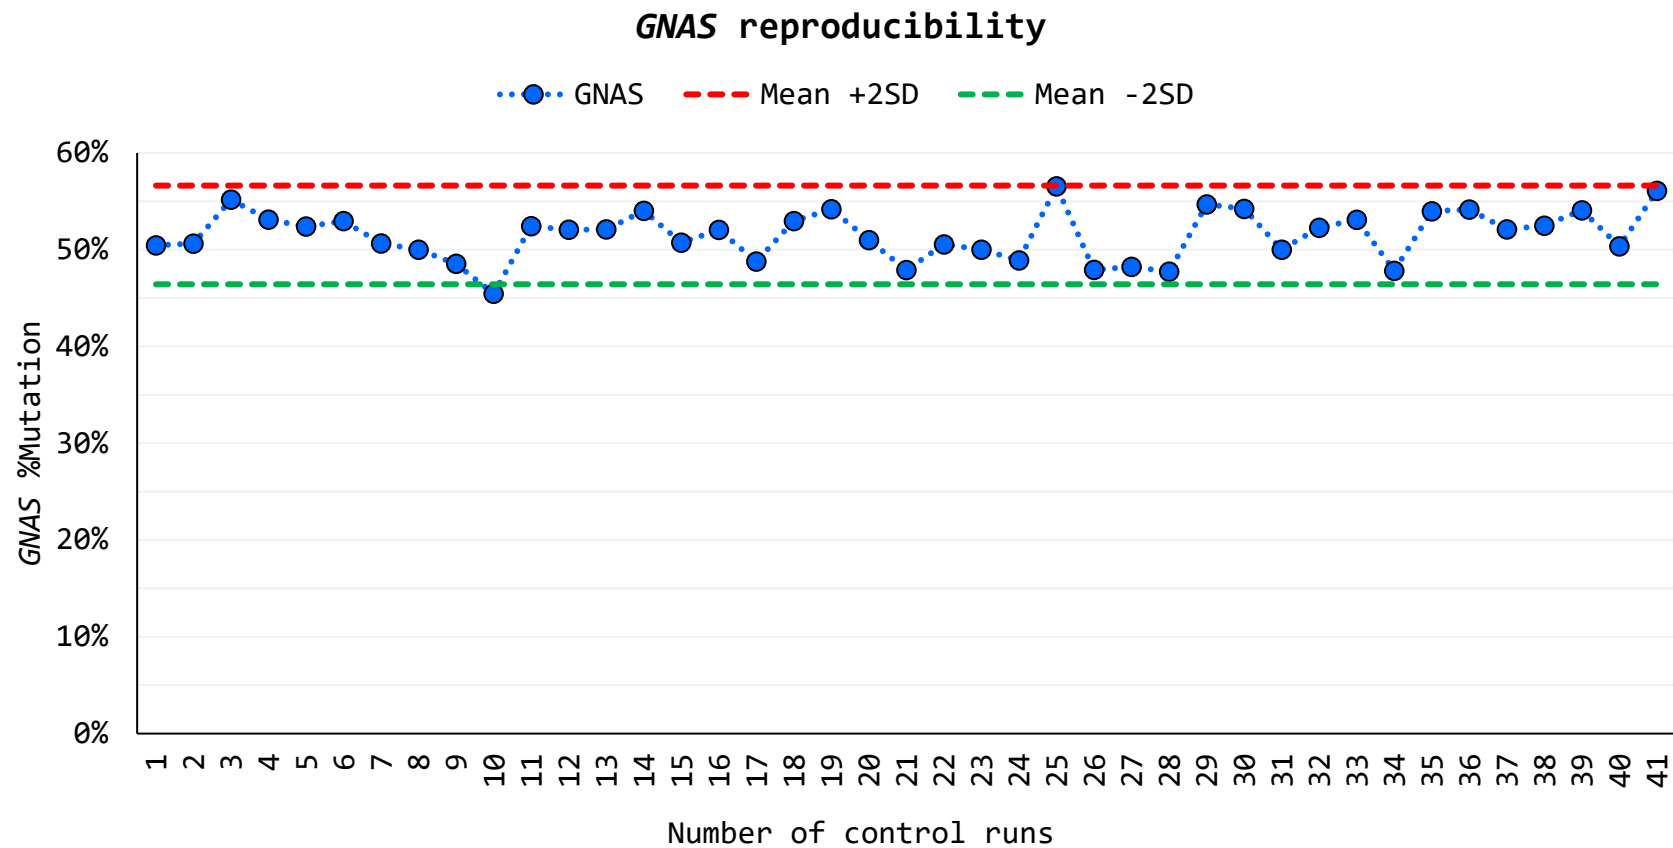

**Supplementary Figure S9.** Levy Jennings plot shows the reproducibility of *GNAS* mutation detection in a clinical setting for one month. A process control sample (Horizon) with an expected 50% mutation is detected with a mean of 51.5% ( $n = 41$ ). Red and green lines show  $\pm 2$  standard deviations from the mean.
